# Supplementary material for: 24-Hour Movement Behaviors in Children with Chronic Disease and Their Healthy Peers: A Case-Control Study
Source: MDPI journal article supplement (doi:10.3390/ijerph19052912), 2022-03-02
Supplement: s1 [file s1]

**Supplementary Table S1:** Accelerometer results based on 24-h data. Data are presented as means and SD

| Variables                                           | T1DM<br>(n =20) | HC<br>(n =20) | JIA<br>(n =20) | HC<br>(n =20) | CHD<br>(n =20) | HC<br>(n =20) | CF<br>(n =20) | HC<br>(n =20) |
|-----------------------------------------------------|-----------------|---------------|----------------|---------------|----------------|---------------|---------------|---------------|
| <b>No. of monitoring days</b>                       | 7.4 (0.9)       | 6.8 (0.9)     | 6.8 (1.0)      | 7.1 (0.7)     | 7.4 (0.8)      | 7.0 (0.9)     | 6.6 (1.4)     | 6.9 (0.6)     |
| <b>No. of monitoring nights</b>                     | 6.9 (0.4)       | 6.6 (0.7)     | 6.7 (0.7)      | 7.0 (0.6)     | 7.1 (0.9)      | 6.0 (0.9)     | 6.5 (1.5)     | 7.1 (0.5)     |
| <b>Monitoring time during waking hours/day</b>      | 13.2 (0.7)      | 13.6 (0.6)    | 13.0 (0.7)     | 13.9 (0.7)    | 13.2 (1.0)     | 13.5 (0.6)    | 13.5 (0.7)    | 13.4 (0.4)    |
| <b>Non-wear time during waking time minutes/day</b> | 20.4 (13.9)     | 18.1 (10.2)   | 15.8 (14.8)    | 12.3 (10.8)   | 17.7 (20.4)    | 7.4 (5.9)     | 9.8 (8.7)     | 9.9 (8.1)     |
| <b>Non-wear time during sleep time minutes/day</b>  | 0               | 0             | 0              | 0             | 0              | 0             | 0             | 0             |
| <b>% of total non-wear time per 24 hours period</b> | 1.3 (1.0)       | 0.3 (0.6)     | 1.1 (1.0)      | 0.9 (0.7)     | 1.2 (1.4)      | 0.5 (0.4)     | 0.7 (0.6)     | 0.6 (0.6)     |

BMI – body mass index; CHD – congenital heart disease; CF – cystic fibrosis; JIA – juvenile idiopathic arthritis; T1DM – type1 diabetes mellitus.

Data are presented as means and standard deviation SD unless otherwise specified.
